# Supplementary material for: Situational analysis of nutritional status among 1899 children presenting with cleft lip and/or palate in Indonesia
Source: PubMed Central journal article supplement (PMC10586796; doi:10.7189/jogh.13.04127), 2023-10-20
Supplement: jogh-13-04127-s001.pdf [file jogh-13-04127-s001.pdf]

**Figure S1.** Flow diagram of study participants

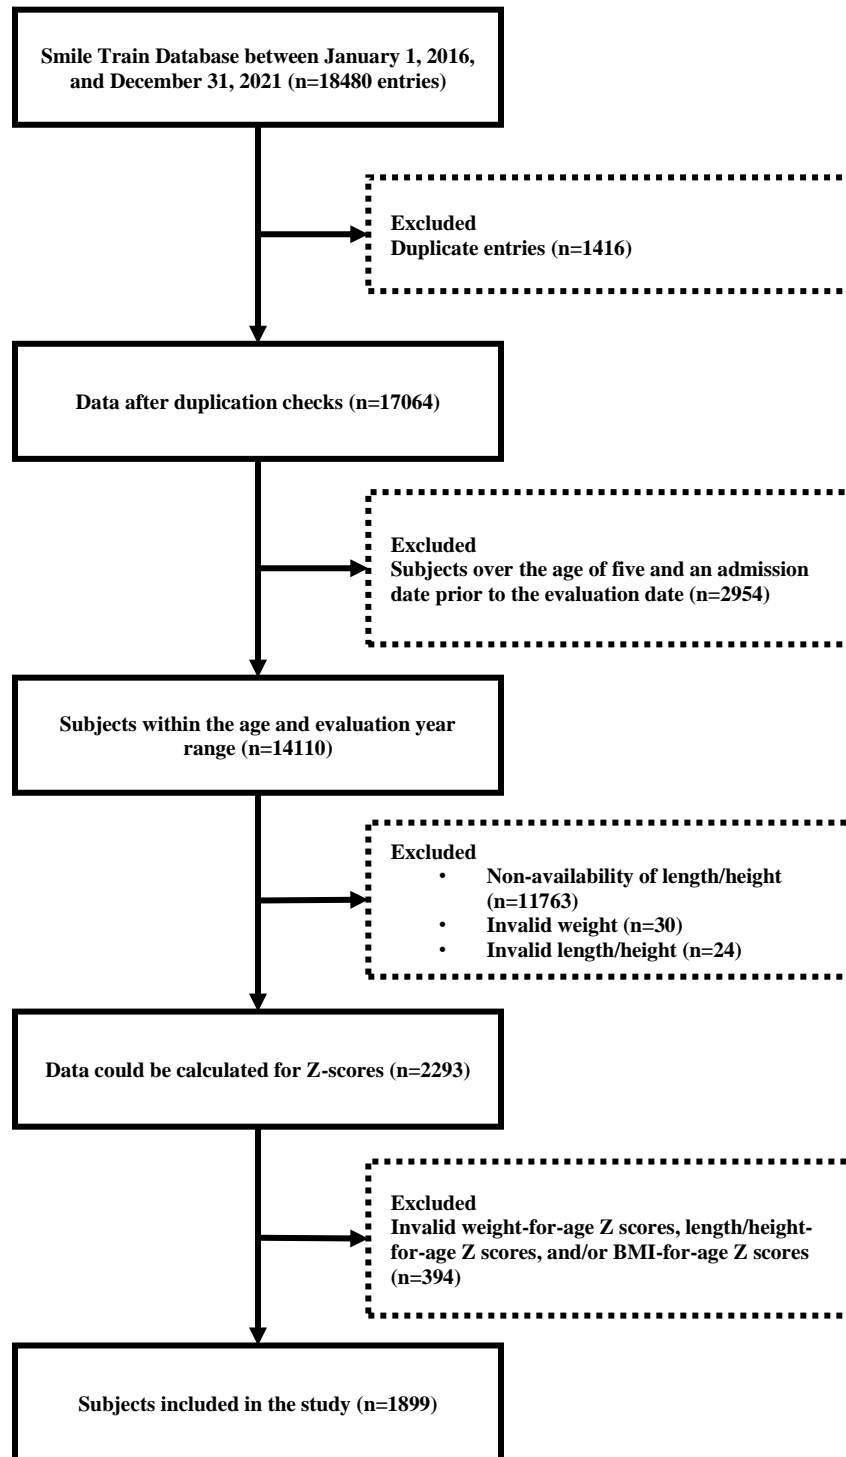

**Table S1.** Prevalence of nutritional status among children under the age of five with CLP

| Growth Indicators          | Length/height-for-age |                  |                    |                  |             |                  | Weight-for-age       |                  |                        |                  |                 |                  | BMI-for-age     |                  |                   |                  |        |                  |                             |                  |            |                  |       |                  |
|----------------------------|-----------------------|------------------|--------------------|------------------|-------------|------------------|----------------------|------------------|------------------------|------------------|-----------------|------------------|-----------------|------------------|-------------------|------------------|--------|------------------|-----------------------------|------------------|------------|------------------|-------|------------------|
|                            | Severely stunted      |                  | Moderately Stunted |                  | Not Stunted |                  | Severely Underweight |                  | Moderately Underweight |                  | Not Underweight |                  | Severely wasted |                  | Moderately Wasted |                  | Normal |                  | Possible risk of overweight |                  | Overweight |                  | Obese |                  |
|                            | Count                 | Percent (95% CI) | Count              | Percent (95% CI) | Count       | Percent (95% CI) | Count                | Percent (95% CI) | Count                  | Percent (95% CI) | Count           | Percent (95% CI) | Count           | Percent (95% CI) | Count             | Percent (95% CI) | Count  | Percent (95% CI) | Count                       | Percent (95% CI) | Count      | Percent (95% CI) | Count | Percent (95% CI) |
| <b>Sex</b>                 |                       |                  |                    |                  |             |                  |                      |                  |                        |                  |                 |                  |                 |                  |                   |                  |        |                  |                             |                  |            |                  |       |                  |
| Girls (n=749)              | 90                    | 12.0 (9.7-14.3)  | 74                 | 9.9 (7.7-12.0)   | 585         | 78.1 (75.1-81.1) | 11                   | 1.5 (0.6-2.3)    | 41                     | 5.5 (3.8-7.1)    | 697             | 93.1 (91.2-94.9) | 33              | 4.4 (2.9-5.9)    | 29                | 3.9 (2.5-5.3)    | 458    | 61.1 (57.7-64.6) | 142                         | 19.0 (16.2-21.8) | 61         | 8.1 (6.2-10.1)   | 26    | 3.5 (2.2-4.8)    |
| Boys (n=1150)              | 154                   | 13.4 (11.4-15.4) | 146                | 12.7 (10.8-14.6) | 850         | 73.9 (71.4-76.5) | 16                   | 1.4 (0.7-2.1)    | 62                     | 5.4 (4.1-6.7)    | 1072            | 93.2 (91.8-94.7) | 65              | 5.7 (4.3-7.0)    | 110               | 9.6 (7.9-11.3)   | 627    | 54.5 (51.6-57.4) | 191                         | 16.6 (14.5-18.8) | 113        | 9.8 (8.1-11.5)   | 44    | 3.8 (2.7-4.9)    |
| <b>Age groups (months)</b> |                       |                  |                    |                  |             |                  |                      |                  |                        |                  |                 |                  |                 |                  |                   |                  |        |                  |                             |                  |            |                  |       |                  |
| 0-5 (n=605)                | 69                    | 11.4 (8.9-13.9)  | 68                 | 11.2 (8.7-13.8)  | 468         | 77.4 (74.0-80.7) | 4                    | 0.7 (0.0-1.3)    | 29                     | 4.8 (3.1-6.5)    | 572             | 94.5 (92.7-96.4) | 24              | 4.0 (2.4-5.5)    | 42                | 6.9 (4.9-9.0)    | 348    | 57.5 (53.6-61.5) | 109                         | 18.0 (15.0-21.1) | 59         | 9.8 (7.4-12.1)   | 23    | 3.8 (2.3-5.3)    |
| 6-11 (n=481)               | 54                    | 11.2 (8.4-14.0)  | 51                 | 10.6 (7.9-13.4)  | 376         | 78.2 (74.5-81.9) | 7                    | 1.5 (0.4-2.5)    | 31                     | 6.4 (4.3-8.6)    | 443             | 92.1 (89.7-94.5) | 19              | 4.0 (2.2-5.7)    | 56                | 11.6 (8.8-14.5)  | 282    | 58.6 (54.2-63.0) | 78                          | 16.2 (12.9-19.5) | 35         | 7.3 (5.0-9.6)    | 11    | 2.3 (1.0-3.6)    |
| 12-23 (n=490)              | 72                    | 14.7 (11.6-17.8) | 51                 | 10.4 (7.7-13.1)  | 367         | 74.9 (71.1-78.7) | 6                    | 1.2 (0.3-2.2)    | 25                     | 5.1 (3.2-7.1)    | 459             | 93.7 (91.5-95.8) | 32              | 6.5 (4.3-8.7)    | 28                | 5.7 (3.7-7.8)    | 263    | 53.7 (49.3-58.1) | 95                          | 19.4 (15.9-22.9) | 48         | 9.8 (7.2-12.4)   | 24    | 4.9 (3.0-6.8)    |
| 24-35 (n=174)              | 25                    | 14.4 (9.2-19.6)  | 26                 | 14.9 (9.6-20.2)  | 123         | 70.7 (63.9-77.5) | 5                    | 2.9 (0.4-5.4)    | 7                      | 4.0 (1.1-6.9)    | 162             | 93.1 (89.3-96.9) | 20              | 11.5 (6.8-16.2)  | 8                 | 4.6 (1.5-7.7)    | 98     | 56.3 (49.0-63.7) | 26                          | 14.9 (9.6-20.2)  | 17         | 9.8 (5.4-14.2)   | 5     | 2.9 (0.4-5.4)    |
| 36-47 (n=98)               | 18                    | 18.4 (10.7-26.0) | 15                 | 15.3 (8.2-22.4)  | 65          | 66.3 (57.0-75.7) | 4                    | 4.1 (0.2-8.0)    | 7                      | 7.1 (2.0-12.2)   | 87              | 88.8 (82.5-95.0) | 0               | 0.0              | 3                 | 3.1 (0.0-6.5)    | 65     | 66.3 (57.0-75.7) | 13                          | 13.3 (6.5-20.0)  | 12         | 12.2 (5.8-18.7)  | 5     | 5.1 (0.7-9.5)    |

|                              |    |                             |    |                             |     |                             |   |                       |    |                        |     |                              |    |                        |   |                       |     |                             |    |                             |    |                        |    |                       |
|------------------------------|----|-----------------------------|----|-----------------------------|-----|-----------------------------|---|-----------------------|----|------------------------|-----|------------------------------|----|------------------------|---|-----------------------|-----|-----------------------------|----|-----------------------------|----|------------------------|----|-----------------------|
| 48-60<br>(n=51)              | 6  | 11.8<br>(2.9-<br>20.6)      | 9  | 17.6<br>(7.2-<br>28.1)      | 36  | 70.6<br>(58.1<br>-<br>83.1) | 1 | 2.0<br>(0.0-<br>5.8)  | 4  | 7.8<br>(0.5-<br>15.2)  | 46  | 90.2<br>(82.0<br>-<br>98.4)  | 3  | 5.9<br>(0.0-<br>12.3)  | 2 | 3.9<br>(0.0-<br>9.2)  | 29  | 56.9<br>(43.3<br>-<br>70.5) | 12 | 23.5<br>(11.9<br>-<br>35.2) | 3  | 5.9<br>(0.0-<br>12.3)  | 2  | 3.9<br>(0.0-<br>9.2)  |
| <b>Province of Origin</b>    |    |                             |    |                             |     |                             |   |                       |    |                        |     |                              |    |                        |   |                       |     |                             |    |                             |    |                        |    |                       |
| Aceh<br>(n=169)              | 21 | 12.4<br>(7.5-<br>17.4)      | 16 | 9.5<br>(5.1-<br>13.9)       | 132 | 78.1<br>(71.9<br>-<br>84.3) | 0 | 0.0<br>(0.0-<br>0.0)  | 4  | 2.4<br>(0.1-<br>4.7)   | 165 | 97.6<br>(95.3<br>-<br>99.9)  | 1  | 0.6<br>(0.0-<br>1.7)   | 7 | 4.1<br>(1.1-<br>7.1)  | 100 | 59.2<br>(51.8<br>-<br>66.6) | 38 | 22.5<br>(16.2<br>-<br>28.8) | 12 | 7.1<br>(3.2-<br>11.0)  | 11 | 6.5<br>(2.8-<br>10.2) |
| North<br>Sumatera<br>(n=256) | 23 | 9.0<br>(5.5-<br>12.5)       | 29 | 11.3<br>(7.4-<br>15.2)      | 204 | 79.7<br>(74.8<br>-<br>84.6) | 1 | 0.4<br>(0.0-<br>1.2)  | 3  | 1.2<br>(0.0-<br>2.5)   | 252 | 98.4<br>(96.9<br>-<br>100.0) | 2  | 0.8<br>(0.0-<br>1.9)   | 5 | 2.0<br>(0.3-<br>3.6)  | 152 | 59.4<br>(53.4<br>-<br>65.4) | 66 | 25.8<br>(20.4<br>-<br>31.1) | 28 | 10.9<br>(7.1-<br>14.8) | 3  | 1.2<br>(0.0-<br>2.5)  |
| West<br>Sumatera<br>(n=23)   | 7  | 30.4<br>(11.6<br>-<br>49.2) | 3  | 13.0<br>(0.0-<br>26.8)      | 13  | 56.5<br>(36.3<br>-<br>76.8) | 1 | 4.3<br>(0.0-<br>12.7) | 3  | 13.0<br>(0.0-<br>26.8) | 19  | 82.6<br>(67.1<br>-<br>98.1)  | 3  | 13.0<br>(0.0-<br>26.8) | 2 | 8.7<br>(0.0-<br>20.2) | 8   | 34.8<br>(15.3<br>-<br>54.2) | 9  | 39.1<br>(19.2<br>-<br>59.1) | 0  | 0.0                    | 1  | 4.3<br>(0.0-<br>12.7) |
| Riau<br>(n=171)              | 31 | 18.1<br>(12.4<br>-<br>23.9) | 24 | 14.0<br>(8.8-<br>19.2)      | 116 | 67.8<br>(60.8<br>-<br>74.8) | 5 | 2.9<br>(0.4-<br>5.4)  | 20 | 11.7<br>(6.9-<br>16.5) | 146 | 85.4<br>(80.1<br>-<br>90.7)  | 16 | 9.4<br>(5.0-<br>13.7)  | 7 | 4.1<br>(1.1-<br>7.1)  | 89  | 52.0<br>(44.6<br>-<br>59.5) | 36 | 21.1<br>(14.9<br>-<br>27.2) | 13 | 7.6<br>(3.6-<br>11.6)  | 10 | 5.8<br>(2.3-<br>9.4)  |
| Jambi<br>(n=10)              | 1  | 10.0<br>(0.0-<br>28.6)      | 3  | 30.0<br>(1.6-<br>58.4)      | 6   | 60.0<br>(29.6<br>-<br>90.4) | 0 | 0.0                   | 0  | 0.0                    | 10  | 100.0                        | 0  | 0.0                    | 0 | 0.0                   | 7   | 70.0<br>(41.6<br>-<br>98.4) | 2  | 20.0<br>(0.0-<br>44.8)      | 1  | 10.0<br>(0.0-<br>28.6) | 0  | 0.0                   |
| South<br>Sumatera<br>(n=33)  | 3  | 9.1<br>(0.0-<br>18.9)       | 3  | 9.1<br>(0.0-<br>18.9)       | 27  | 81.8<br>(68.7<br>-<br>95.0) | 0 | 0.0                   | 1  | 3.0<br>(0.0-<br>8.9)   | 32  | 97.0<br>(91.1<br>-<br>100.0) | 2  | 6.1<br>(0.0-<br>14.2)  | 3 | 9.1<br>(0.0-<br>18.9) | 19  | 57.6<br>(40.7<br>-<br>74.4) | 4  | 12.1<br>(1.0-<br>23.3)      | 5  | 15.2<br>(2.9-<br>27.4) | 0  | 0.0                   |
| Bengkulu<br>(n=22)           | 4  | 18.2<br>(2.1-<br>34.3)      | 1  | 4.5<br>(0.0-<br>13.2)       | 17  | 77.3<br>(59.8<br>-<br>94.8) | 0 | 0.0                   | 3  | 13.6<br>(0.0-<br>28.0) | 19  | 86.4<br>(72.0<br>-<br>100.0) | 1  | 4.5<br>(0.0-<br>13.2)  | 2 | 9.1<br>(0.0-<br>21.1) | 10  | 45.5<br>(24.6<br>-<br>66.3) | 6  | 27.3<br>(8.7-<br>45.9)      | 3  | 13.6<br>(0.0-<br>28.0) | 0  | 0.0                   |
| Bangka<br>Belitung<br>(n=1)  | 1  | 100.0                       | 0  | 0.0                         | 0   | 0.0                         | 0 | 0.0                   | 0  | 0.0                    | 1   | 100.0                        | 0  | 0.0                    | 0 | 0.0                   | 0   | 0.0                         | 0  | 0.0                         | 0  | 0.0                    | 1  | 100.0                 |
| Riau Islands<br>(n=38)       | 4  | 10.5<br>(0.8-<br>20.3)      | 10 | 26.3<br>(12.3<br>-<br>40.3) | 24  | 63.2<br>(47.8<br>-<br>78.5) | 1 | 2.6<br>(0.0-<br>7.7)  | 4  | 10.5<br>(0.8-<br>20.3) | 33  | 86.8<br>(76.1<br>-<br>97.6)  | 1  | 2.6<br>(0.0-<br>7.7)   | 3 | 7.9<br>(0.0-<br>16.5) | 17  | 44.7<br>(28.9<br>-<br>60.5) | 11 | 28.9<br>(14.5<br>-<br>43.4) | 5  | 13.2<br>(2.4-<br>23.9) | 1  | 2.6<br>(0.0-<br>7.7)  |

| Province                  | n  | Prevalence (%) |             | 95% CI | n    | Prevalence (%) |        | 95% CI | n            | Prevalence (%) |        | 95% CI    | n  | Prevalence (%) |            | 95% CI | n     | Prevalence (%) |        | 95% CI | n          | Prevalence (%) |        | 95% CI      |     |       |              |    |      |             |    |      |             |    |      |            |
|---------------------------|----|----------------|-------------|--------|------|----------------|--------|--------|--------------|----------------|--------|-----------|----|----------------|------------|--------|-------|----------------|--------|--------|------------|----------------|--------|-------------|-----|-------|--------------|----|------|-------------|----|------|-------------|----|------|------------|
|                           |    | Prevalence     | 95% CI      |        |      | Prevalence     | 95% CI |        |              | Prevalence     | 95% CI |           |    | Prevalence     | 95% CI     |        |       | Prevalence     | 95% CI |        |            | Prevalence     | 95% CI |             |     |       |              |    |      |             |    |      |             |    |      |            |
| Lampung (n=116)           | 10 | 8.6            | (3.5-13.7)  | 7      | 6.0  | (1.7-10.4)     | 99     | 85.3   | (78.9-91.8)  | 1              | 0.9    | (0.0-2.5) | 2  | 1.7            | (0.0-4.1)  | 113    | 97.4  | (94.5-100.0)   | 8      | 6.9    | (2.3-11.5) | 8              | 6.9    | (2.3-11.5)  | 60  | 51.7  | (42.6-60.8)  | 28 | 24.1 | (16.4-31.9) | 8  | 6.9  | (2.3-11.5)  | 4  | 3.4  | (0.1-6.8)  |
| Banten (n=56)             | 3  | 5.4            | (0.0-11.3)  | 10     | 17.9 | (7.8-27.9)     | 43     | 76.8   | (65.7-87.8)  | 0              | 0.0    |           | 0  | 0.0            |            | 56     | 100.0 |                | 0      | 0.0    |            | 0              | 0.0    |             | 19  | 33.9  | (21.5-46.3)  | 20 | 35.7 | (23.2-48.3) | 15 | 26.8 | (15.2-38.4) | 2  | 3.6  | (0.0-8.4)  |
| Jakarta (n=42)            | 1  | 2.4            | (0.0-7.0)   | 1      | 2.4  | (0.0-7.0)      | 40     | 95.2   | (88.8-100.0) | 0              | 0.0    |           | 2  | 4.8            | (0.0-11.2) | 40     | 95.2  | (88.8-100.0)   | 5      | 11.9   | (2.1-21.7) | 13             | 31.0   | (17.0-44.9) | 16  | 38.1  | (23.4-52.8)  | 4  | 9.5  | (0.6-18.4)  | 3  | 7.1  | (0.0-14.9)  | 1  | 2.4  | (0.0-7.0)  |
| West Java (n=525)         | 56 | 10.7           | (8.0-13.3)  | 59     | 11.2 | (8.5-13.9)     | 410    | 78.1   | (74.6-81.6)  | 10             | 1.9    | (0.7-3.1) | 32 | 6.1            | (4.0-8.1)  | 483    | 92.0  | (89.7-94.3)    | 46     | 8.8    | (6.3-11.2) | 64             | 12.2   | (9.4-15.0)  | 312 | 59.4  | (55.2-63.6)  | 53 | 10.1 | (7.5-12.7)  | 31 | 5.9  | (3.9-7.9)   | 19 | 3.6  | (2.0-5.2)  |
| Central Java (n=153)      | 22 | 14.4           | (8.8-19.9)  | 24     | 15.7 | (9.9-21.4)     | 107    | 69.9   | (62.7-77.2)  | 5              | 3.3    | (0.5-6.1) | 12 | 7.8            | (3.6-12.1) | 136    | 88.9  | (83.9-93.9)    | 4      | 2.6    | (0.1-5.1)  | 9              | 5.9    | (2.2-9.6)   | 102 | 66.7  | (59.2-74.1)  | 24 | 15.7 | (9.9-21.4)  | 11 | 7.2  | (3.1-11.3)  | 3  | 2.0  | (0.0-4.2)  |
| Yogyakarta (n=2)          | 0  | 0.0            | (0.0-0.0)   | 0      | 0.0  |                | 2      | 100.0  |              | 0              | 0.0    |           | 0  | 0.0            |            | 2      | 100.0 |                | 0      | 0.0    |            | 1              | 50.0   | (0.0-100.0) | 1   | 50.0  | (0.0-100.0)  | 0  | 0.0  |             | 0  | 0.0  |             |    |      |            |
| East Java (n=95)          | 23 | 24.2           | (15.6-32.8) | 8      | 8.4  | (2.8-14.0)     | 64     | 67.4   | (57.9-76.8)  | 0              | 0.0    |           | 2  | 2.1            | (0.0-5.0)  | 93     | 97.9  | (95.0-100.0)   | 2      | 2.1    | (0.0-5.0)  | 1              | 1.1    | (0.0-3.1)   | 59  | 62.1  | (52.3-71.9)  | 12 | 12.6 | (6.0-19.3)  | 10 | 10.5 | (4.4-16.7)  | 11 | 11.6 | (5.1-18.0) |
| West Nusa Tenggara (n=41) | 3  | 7.3            | (-0.7-15.3) | 5      | 12.2 | (2.2-22.2)     | 33     | 80.5   | (68.4-92.6)  | 1              | 2.4    | (0.0-7.2) | 4  | 9.8            | (0.7-18.8) | 36     | 87.8  | (77.8-97.8)    | 3      | 7.3    | (0.0-15.3) | 8              | 19.5   | (7.4-31.6)  | 21  | 51.2  | (35.9-66.5)  | 5  | 12.2 | (2.2-22.2)  | 4  | 9.8  | (0.7-18.8)  | 0  | 0.0  |            |
| West Kalimantan (n=14)    | 0  | 0.0            |             | 0      | 0.0  |                | 14     | 100.0  |              | 0              | 0.0    |           | 0  | 0.0            |            | 14     | 100.0 |                | 0      | 0.0    |            | 0              | 0.0    |             | 11  | 78.6  | (57.1-100.0) | 2  | 14.3 | (0.0-32.6)  | 1  | 7.1  | (0.0-20.6)  | 0  | 0.0  |            |
| Central Kalimantan (n=4)  | 0  | 0.0            |             | 0      | 0.0  |                | 4      | 100.0  |              | 0              | 0.0    |           | 0  | 0.0            |            | 4      | 100.0 |                | 0      | 0.0    |            | 0              | 0.0    |             | 4   | 100.0 |              | 0  | 0.0  |             | 0  | 0.0  |             |    |      |            |

|                          |            |                             |            |                             |             |                             |           |                          |            |                          |             |                             |           |                          |            |                          |             |                             |            |                             |            |                           |           |                          |
|--------------------------|------------|-----------------------------|------------|-----------------------------|-------------|-----------------------------|-----------|--------------------------|------------|--------------------------|-------------|-----------------------------|-----------|--------------------------|------------|--------------------------|-------------|-----------------------------|------------|-----------------------------|------------|---------------------------|-----------|--------------------------|
| South Kalimantan (n=27)  | 6          | 22.2<br>(6.5-37.9)          | 3          | 11.1<br>(0.0-23.0)          | 18          | 66.7<br>(48.9-84.4)         | 0         | 0.0                      | 0          | 0.0                      | 27          | 100.0                       | 0         | 0.0                      | 1          | 3.7<br>(0.0-10.8)        | 15          | 55.6<br>(36.8-74.3)         | 3          | 11.1<br>(0.0-23.0)          | 7          | 25.9<br>(9.4-42.5)        | 1         | 3.7<br>(0.0-10.8)        |
| West Sulawesi (n=1)      | 1          | 100.0                       | 0          | 0.0                         | 0           | 0.0                         | 0         | 0.0                      | 1          | 100.0                    | 0           | 0.0                         | 0         | 0.0                      | 0          | 0.0                      | 0           | 0.0                         | 1          | 100.0                       | 0          | 0.0                       | 0         | 0.0                      |
| South Sulawesi (n=35)    | 12         | 34.3<br>(18.6-50.0)         | 5          | 14.3<br>(2.7-25.9)          | 18          | 51.4<br>(34.9-68.0)         | 0         | 0.0                      | 0          | 0.0                      | 35          | 100.0                       | 1         | 2.9<br>(0.0-8.4)         | 1          | 2.9<br>(0.0-8.4)         | 17          | 48.6<br>(32.0-65.1)         | 4          | 11.4<br>(0.9-22.0)          | 10         | 28.6<br>(13.6-43.5)       | 2         | 5.7<br>(0.0-13.4)        |
| Central Sulawesi (n=46)  | 10         | 21.7<br>(9.8-33.7)          | 6          | 13.0<br>(3.3-22.8)          | 30          | 65.2<br>(51.5-79.0)         | 1         | 2.2<br>(0.0-6.4)         | 9          | 19.6<br>(8.1-31.0)       | 36          | 78.3<br>(66.3-90.2)         | 3         | 6.5<br>(0.0-13.7)        | 3          | 6.5<br>(0.0-13.7)        | 31          | 67.4<br>(53.8-80.9)         | 4          | 8.7<br>(0.6-16.8)           | 5          | 10.9<br>(1.9-19.9)        | 0         | 0.0                      |
| Southeast Sulawesi (n=1) | 0          | 0.0                         | 0          | 0.0                         | 1           | 100.0                       | 0         | 0.0                      | 0          | 0.0                      | 1           | 100.0                       | 0         | 0.0                      | 0          | 0.0                      | 1           | 100.0                       | 0          | 0.0                         | 0          | 0.0                       | 0         | 0.0                      |
| West Papua (n=7)         | 1          | 14.3<br>(0.0-40.2)          | 2          | 28.6<br>(0.0-62.0)          | 4           | 57.1<br>(20.5-93.8)         | 1         | 14.3<br>(0.0-40.2)       | 1          | 14.3<br>(0.0-40.2)       | 5           | 71.4<br>(38.0-100.0)        | 0         | 0.0                      | 1          | 14.3<br>(0.0-40.2)       | 5           | 71.4<br>(38.0-100.0)        | 1          | 14.3<br>(0.0-40.2)          | 0          | 0.0                       | 0         | 0.0                      |
| Papua (n=11)             | 1          | 9.1<br>(0.0-26.1)           | 1          | 9.1<br>(0.0-26.1)           | 9           | 81.8<br>(59.0-100.0)        | 0         | 0.0                      | 0          | 0.0                      | 11          | 100.0                       | 0         | 0.0                      | 0          | 0.0                      | 8           | 72.7<br>(46.4-99.0)         | 1          | 9.1<br>(0.0-26.1)           | 2          | 18.2<br>(0.0-41.0)        | 0         | 0.0                      |
| <b>Total (n=1899)</b>    | <b>244</b> | <b>12.8<br/>(11.3-14.4)</b> | <b>220</b> | <b>11.6<br/>(10.1-13.0)</b> | <b>1435</b> | <b>75.6<br/>(73.6-77.5)</b> | <b>27</b> | <b>1.4<br/>(0.9-2.0)</b> | <b>103</b> | <b>5.4<br/>(4.4-6.4)</b> | <b>1769</b> | <b>93.2<br/>(92.0-94.3)</b> | <b>98</b> | <b>5.2<br/>(4.2-6.2)</b> | <b>139</b> | <b>7.3<br/>(6.1-8.5)</b> | <b>1085</b> | <b>57.1<br/>(54.9-59.4)</b> | <b>333</b> | <b>17.5<br/>(15.8-19.2)</b> | <b>174</b> | <b>9.2<br/>(7.9-10.5)</b> | <b>70</b> | <b>3.7<br/>(2.8-4.5)</b> |

CI – confidence interval

**Table S2.** Prevalence of concurrent malnutrition among children under the age of five with CLP

|                                | Concurrent stunting and overweight |                    | Concurrent stunting and underweight |                   | Concurrent wasting and underweight |                   | Concurrent stunting, wasting, and underweight |                   |
|--------------------------------|------------------------------------|--------------------|-------------------------------------|-------------------|------------------------------------|-------------------|-----------------------------------------------|-------------------|
|                                | Count                              | Percent (95% CI)   | Count                               | Percent (95% CI)  | Count                              | Percent (95% CI)  | Count                                         | Percent (95% CI)  |
| <b>Sex</b>                     |                                    |                    |                                     |                   |                                    |                   |                                               |                   |
| Girls<br>(n=749)               | 60                                 | 8.0<br>(6.1-10.0)  | 27                                  | 3.6<br>(2.3-4.9)  | 19                                 | 2.5<br>(1.4-3.7)  | 2                                             | 0.3<br>(0.0-0.6)  |
| Boys<br>(n=1150)               | 106                                | 9.2<br>(7.5-10.9)  | 45                                  | 3.9<br>(2.8-5.0)  | 34                                 | 3.0<br>(2.0-3.9)  | 6                                             | 0.5<br>(0.1-0.9)  |
| <b>Age groups<br/>(months)</b> |                                    |                    |                                     |                   |                                    |                   |                                               |                   |
| 0-5<br>(n=605)                 | 48                                 | 7.9<br>(5.8-10.1)  | 15                                  | 2.5<br>(1.2-3.7)  | 15                                 | 2.5<br>(1.2-3.7)  | 0                                             | 0.0               |
| 6-11<br>(n=481)                | 28                                 | 5.8<br>(3.7-7.9)   | 23                                  | 4.8<br>(2.9-6.7)  | 16                                 | 3.3<br>(1.7-4.9)  | 4                                             | 0.8<br>(0.0-1.6)  |
| 12-23<br>(n=490)               | 54                                 | 11.0<br>(8.2-13.8) | 15                                  | 3.1<br>(1.5-4.6)  | 14                                 | 2.9<br>(1.4-4.3)  | 1                                             | 0.2<br>(0.0-0.6)  |
| 24-35<br>(n=174)               | 21                                 | 12.1<br>(7.2-16.9) | 8                                   | 4.6<br>(1.5-7.7)  | 6                                  | 3.4<br>(0.7-6.2)  | 2                                             | 1.1<br>(0.0-2.7)  |
| 36-47<br>(n=98)                | 13                                 | 13.3<br>(6.5-20.0) | 8                                   | 8.2<br>(2.7-13.6) | 0                                  | 0.0               | 0                                             | 0.0               |
| 48-60<br>(n=51)                | 2                                  | 3.9<br>(0.0-9.2)   | 3                                   | 5.9<br>(0.0-12.3) | 2                                  | 3.9<br>(0.0-9.2)  | 1                                             | 2.0<br>(0.0-5.8)  |
| <b>Province of Origin</b>      |                                    |                    |                                     |                   |                                    |                   |                                               |                   |
| Aceh<br>(n=169)                | 18                                 | 10.7<br>(6.0-15.3) | 3                                   | 1.8<br>(0.0-3.8)  | 0                                  | 0.0               | 0                                             | 0.0               |
| North Sumatera<br>(n=256)      | 24                                 | 9.4<br>(5.8-12.9)  | 2                                   | 0.8<br>(0.0-1.9)  | 2                                  | 0.8<br>(0.0-1.9)  | 0                                             | 0.0               |
| West Sumatera<br>(n=23)        | 1                                  | 4.3(-4.0-<br>12.7) | 2                                   | 8.7<br>(0.0-20.2) | 2                                  | 8.7<br>(0.0-20.2) | 1                                             | 4.3<br>(0.0-12.7) |

|                              |    |                     |    |                   |    |                   |   |                  |
|------------------------------|----|---------------------|----|-------------------|----|-------------------|---|------------------|
| Riau<br>(n=171)              | 16 | 9.4<br>(5.0-13.7)   | 15 | 8.8<br>(4.5-13.0) | 12 | 7.0<br>(3.2-10.8) | 3 | 1.8<br>(0.0-3.7) |
| Jambi<br>(n=10)              | 1  | 10.0<br>(0.0-28.6)  | 0  | 0.0               | 0  | 0.0               | 0 | 0.0              |
| South Sumatera<br>(n=33)     | 2  | 6.1<br>(0.0-14.2)   | 1  | 3.0<br>(0.0-8.9)  | 0  | 0.0               | 0 | 0.0              |
| Bengkulu<br>(n=22)           | 2  | 9.1<br>(0.0-21.1)   | 0  | 0.0               | 2  | 9.1<br>(0.0-21.1) | 0 | 0.0              |
| Bangka Belitung<br>(n=1)     | 1  | 100.0               | 0  | 0.0               | 0  | 0.0               | 0 | 0.0              |
| Riau Islands<br>(n=38)       | 3  | 7.9<br>(0.0-16.5)   | 3  | 7.9<br>(0.0-16.5) | 2  | 5.3<br>(0.0-12.4) | 1 | 2.6<br>(0.0-7.7) |
| Lampung<br>(n=116)           | 9  | 7.8<br>(2.9-12.6)   | 2  | 1.7<br>(0.0-4.1)  | 0  | 0.0               | 0 | 0.0              |
| Banten<br>(n=56)             | 9  | 16.1<br>(6.5-25.7)  | 0  | 0.0               | 0  | 0.0               | 0 | 0.0              |
| Jakarta<br>(n=42)            | 1  | 2.4<br>(0.0-7.0)    | 1  | 2.4<br>(0.0-7.0)  | 1  | 2.4<br>(0.0-7.0)  | 0 | 0.0              |
| West Java<br>(n=525)         | 29 | 5.5<br>(3.6-7.5)    | 24 | 4.6<br>(2.8-6.4)  | 17 | 3.2<br>(1.7-4.8)  | 2 | 0.4<br>(0.0-0.9) |
| Central Java<br>(n=153)      | 8  | 5.2<br>(1.7-8.8)    | 9  | 5.9<br>(2.2-9.6)  | 5  | 3.3<br>(0.5-6.1)  | 0 | 0.0              |
| Yogyakarta<br>(n=2)          | 0  | 0.0                 | 0  | 0.0               | 0  | 0.0               | 0 | 0.0              |
| East Java<br>(n=95)          | 17 | 17.9<br>(10.2-25.6) | 0  | 0.0               | 2  | 2.1<br>(0.0-5.0)  | 0 | 0.0              |
| West Nusa Tenggara<br>(n=41) | 3  | 7.3<br>(0.0-15.3)   | 1  | 2.4<br>(0.0-7.2)  | 4  | 9.8<br>(0.7-18.8) | 0 | 0.0              |
| West Kalimantan<br>(n=14)    | 0  | 0.0                 | 0  | 0.0               | 0  | 0.0               | 0 | 0.0              |
| Central Kalimantan<br>(n=4)  | 0  | 0.0                 | 0  | 0.0               | 0  | 0.0               | 0 | 0.0              |

|                             |            |                           |           |                          |           |                          |          |                          |
|-----------------------------|------------|---------------------------|-----------|--------------------------|-----------|--------------------------|----------|--------------------------|
| South Kalimantan<br>(n=27)  | 5          | 18.5<br>(3.9-33.2)        | 0         | 0.0                      | 0         | 0.0                      | 0        | 0.0                      |
| West Sulawesi<br>(n=1)      | 0          | 0.0                       | 1         | 100.0                    | 0         | 0.0                      | 0        | 0.0                      |
| South Sulawesi<br>(n=35)    | 11         | 31.4<br>(16.0-46.8)       | 0         | 0.0                      | 0         | 0.0                      | 0        | 0.0                      |
| Central Sulawesi<br>(n=46)  | 5          | 10.9<br>(1.9-19.9)        | 6         | 13.0<br>(3.3-22.8)       | 3         | 6.5<br>(0.0-13.7)        | 0        | 0.0                      |
| Southeast Sulawesi<br>(n=1) | 0          | 0.0                       | 0         | 0.0                      | 0         | 0.0                      | 0        | 0.0                      |
| West Papua<br>(n=7)         | 0          | 0.0                       | 2         | 28.6<br>(0.0-62.0)       | 1         | 14.3<br>(0.0-40.2)       | 1        | 14.3<br>(0.0-40.2)       |
| Papua<br>(n=11)             | 1          | 9.1<br>(0.0-26.1)         | 0         | 0.0                      | 0         | 0.0                      | 0        | 0.0                      |
| <b>Total<br/>(n=1899)</b>   | <b>166</b> | <b>8.7<br/>(7.5-10.0)</b> | <b>72</b> | <b>3.8<br/>(2.9-4.7)</b> | <b>53</b> | <b>2.8<br/>(2.1-3.5)</b> | <b>8</b> | <b>0.4<br/>(0.1-0.7)</b> |

CI – confidence interval
